# Supplementary material
Source: publisher figshare collection journal article supplement (https://gsapubs.figshare.com/ndownloader/files/27185084)
Supplement: Supplementary file 1 [file 27185084]

Table S2. Locations of OSL samples from Badger Canyon.

| Sample number | Context | Latitude (degrees) | Longitude (degrees) | Depth (m) |
| --- | --- | --- | --- | --- |
| BC3 | WT-1A: Qf3 | 34/1909 | -117.3146 | 3.66 |
| BC4 | WT-1A: Qf3 | 34/1909 | -117.3146 | 3.81 |
| BC5 | WT-1A: Qf3 | 34.1913 | -117.3142 | 3.96 |
| BC2 | WT-3C: Qf2 | 34.1926 | -117.3168 | 2.74 |
| BC6 | QT-1A: Qf2a | 34.1916 | -117.3140 | 2.59 |
| BC8 | WT-9: Qf1 | 34.1935 | -117.3194 | 3.35 |
| BC9 | WT-9: Qf1 | 34.1935 | -117.3194 | 3.35 |
